# Supplementary material
Source: Springer Nature journal article supplement (https://www.springermedizin.de/resource/supplementary/12885_2013_4456_MOESM4_ESM.pdf/9466468)
Supplement: MOESM4 [file 9466468]

**Additional file 4 – Transfections with remaining *Ch25h* promoter reporters**

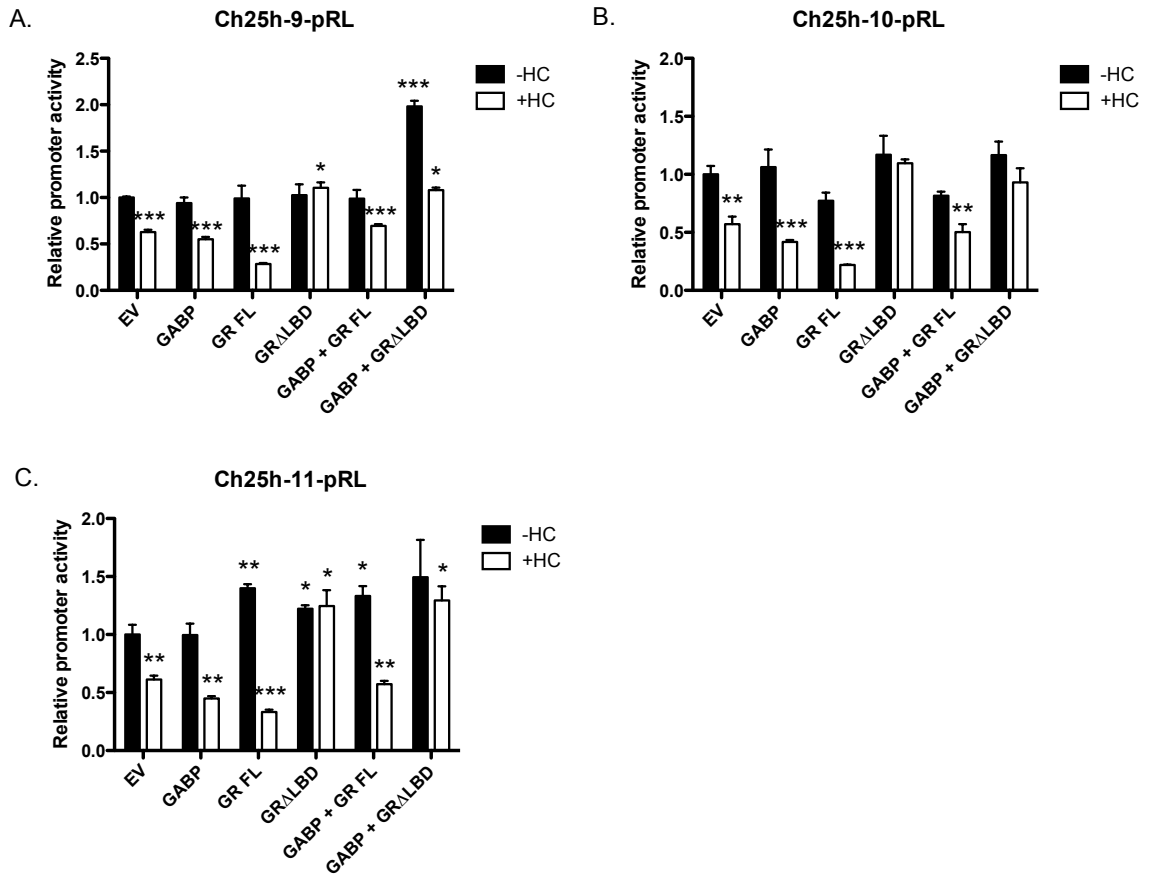

**Figure S3: GRΔLBD activates the *Ch25h* promoter in the presence and absence of HC.**

EPH-4 cells were transiently transfected with the *Ch25h* promoter reporters **A.** Ch25h-9-pRL, **B.** Ch25h-10-pRL and **C.** Ch25h-11-pRL as well as with expression vectors for GABP $\alpha/\beta$  (GABP), full-length GR (GR FL) and GR lacking the ligand binding domain (GRΔLBD). Cells were treated 24 hours after transfection with either ethanol vehicle (-HC) or 1  $\mu$ g/mL HC (+HC) and assayed for luciferase activity following a 48 hour incubation. Bars represent the mean of technical replicates, and error bars represent standard deviation (N = 3). Statistically significant changes in *Ch25h* promoter activity relative to the EV (-HC) transfection are indicated: one asterisk,  $p < 0.05$  (significant); two asterisks,  $p < 0.005$  (very significant); three asterisks,  $p < 0.0005$  (very highly significant).
